# Supplementary material for: miR-22 suppresses DNA ligase III addiction in multiple myeloma
Source: PubMed Central journal article supplement (PMC6365379; doi:10.1038/s41375-018-0238-2), 2018-08-17

# Supplementary Fig.1

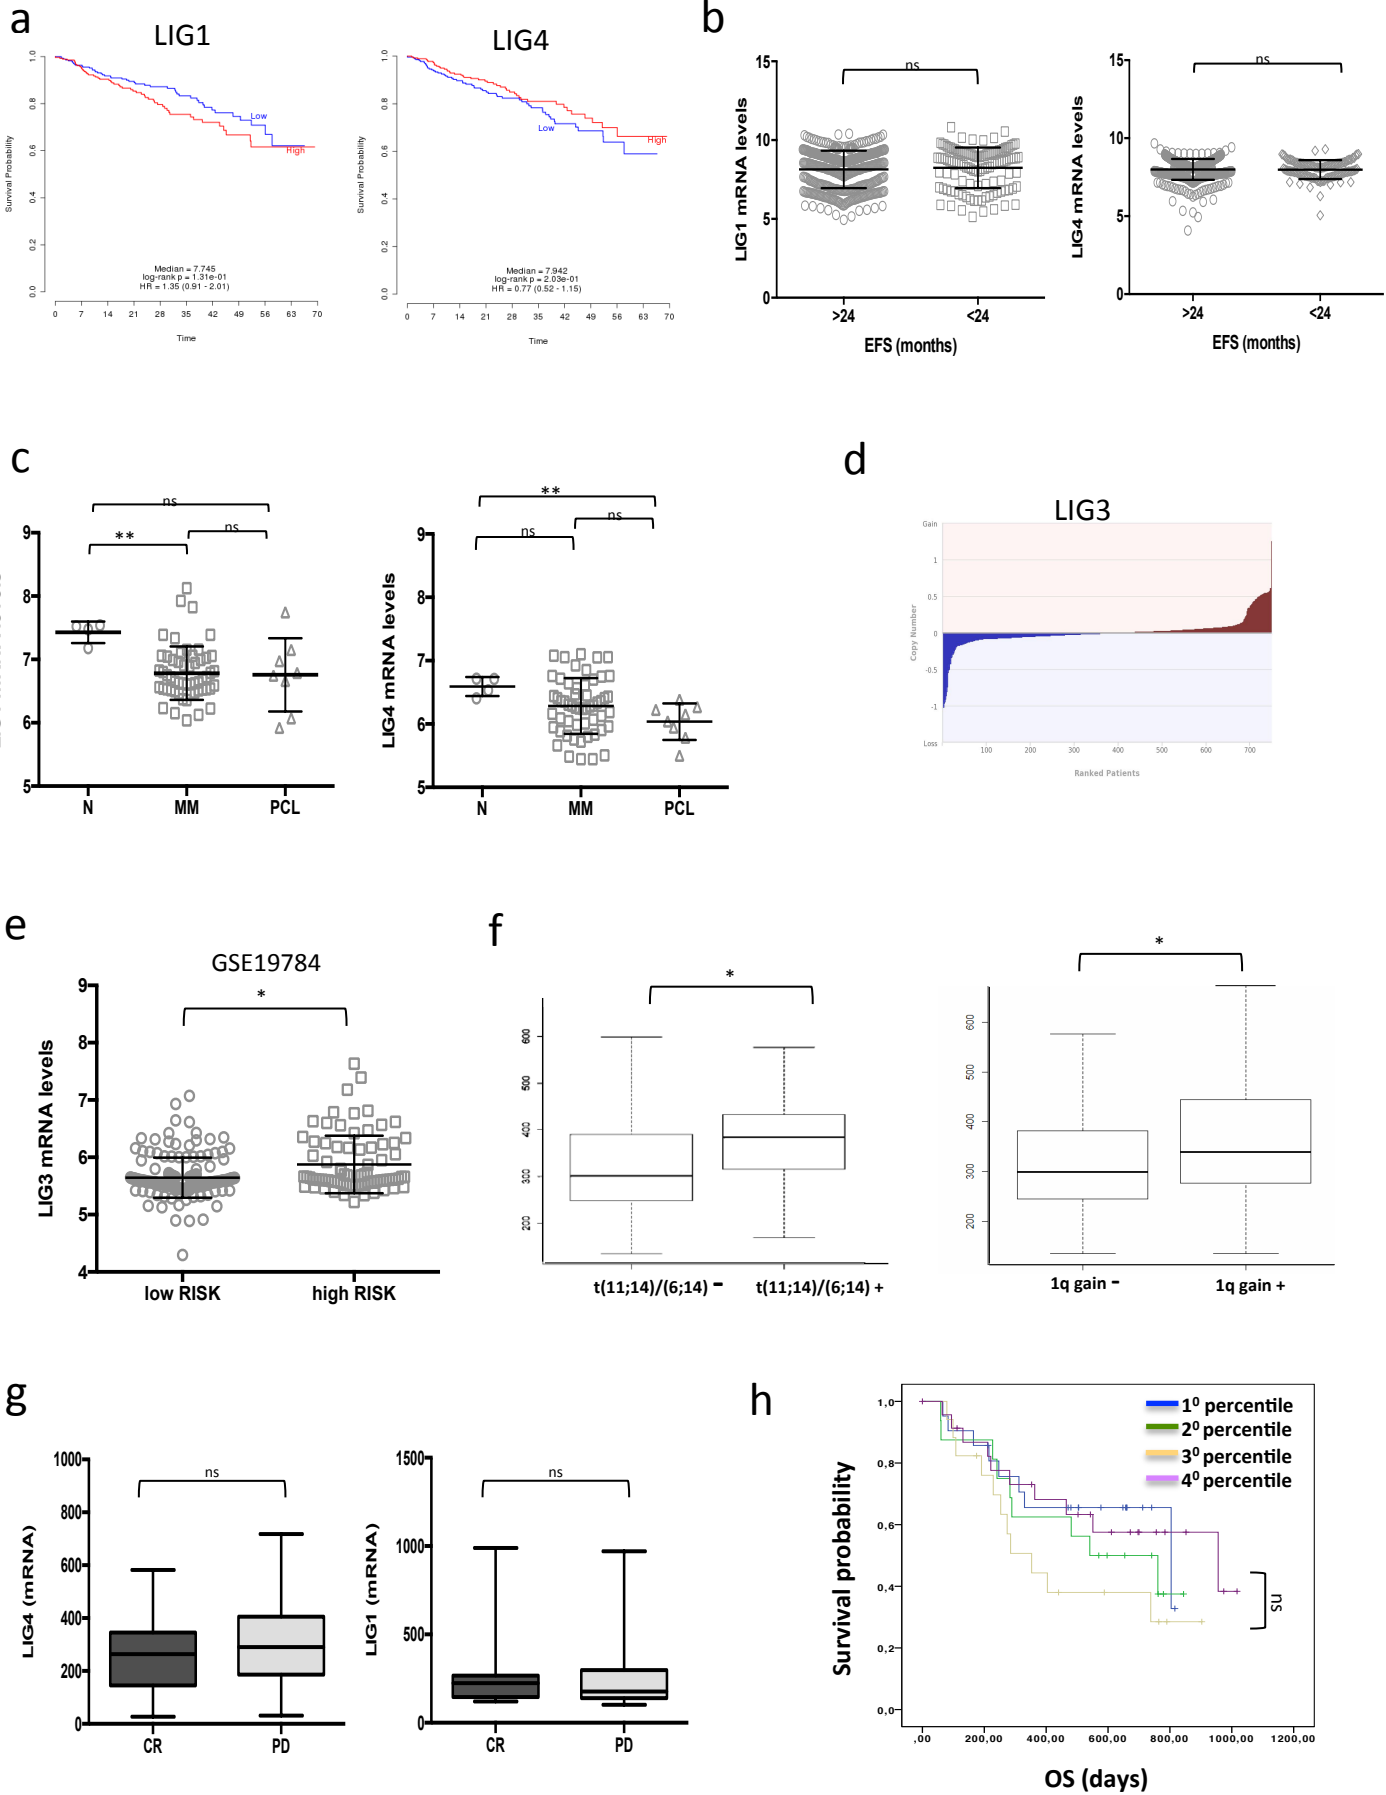

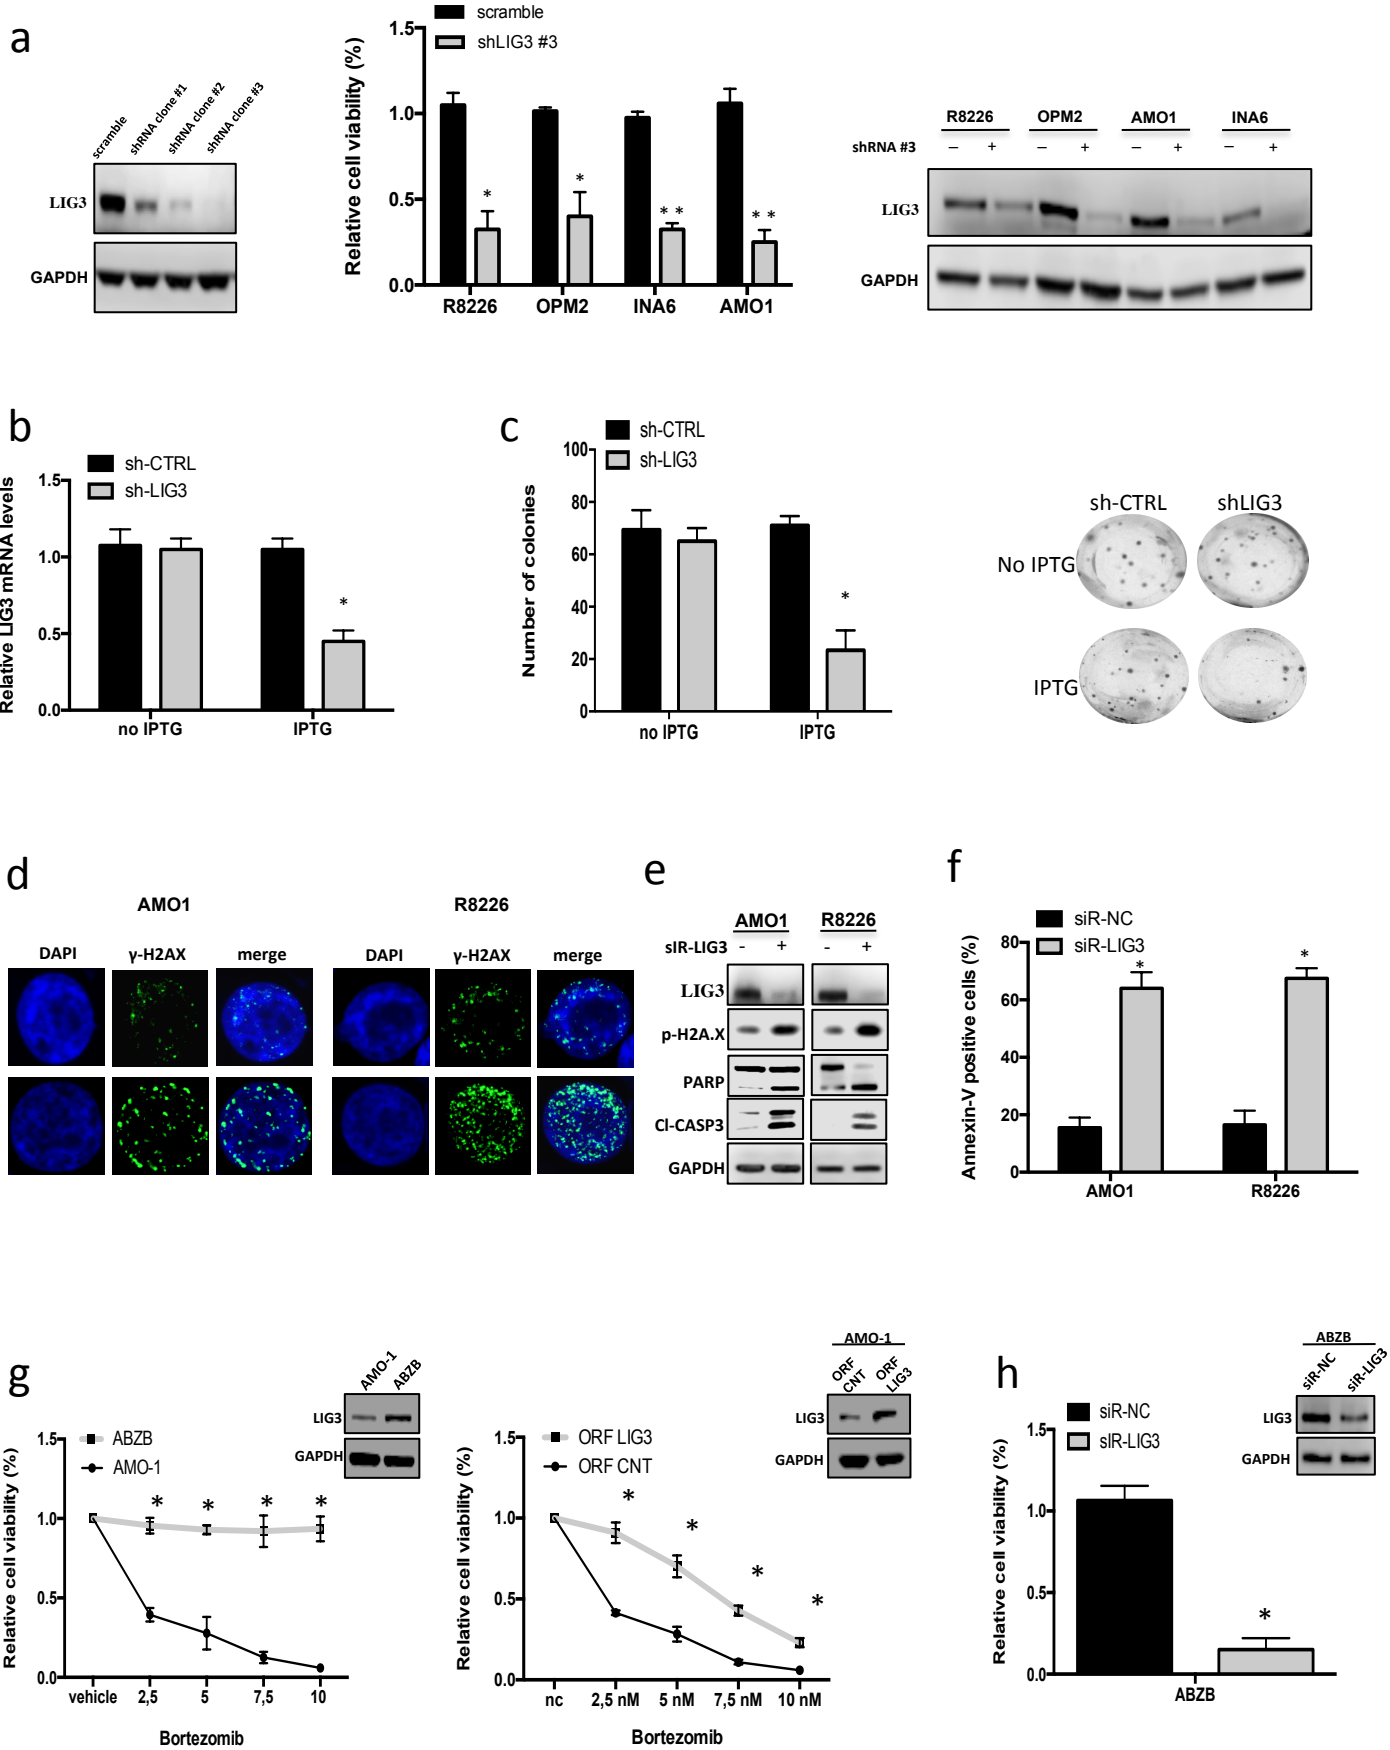

| GENE SYMBOL | microRNA        | Integrated score | Number of source | Score Class |
|-------------|-----------------|------------------|------------------|-------------|
| LIG3        | hsa-miR-204-5p  | 0.466            | 13               | Very high   |
| LIG3        | hsa-miR-211-5p  | 0.439            | 13               | Very high   |
| LIG3        | hsa-miR-22-3p   | 0.430            | 12               | Very high   |
| LIG3        | hsa-miR-31-5p   | 0.390            | 12               | Very high   |
| LIG3        | hsa-miR-146b-5p | 0.385            | 13               | Very high   |

a

b

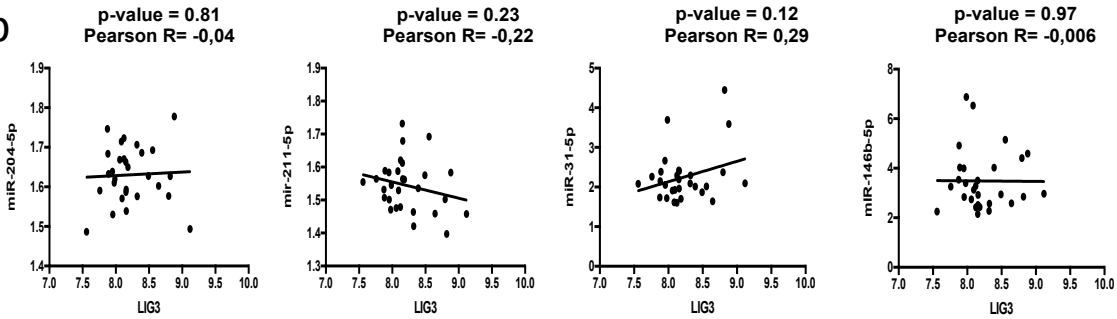

c

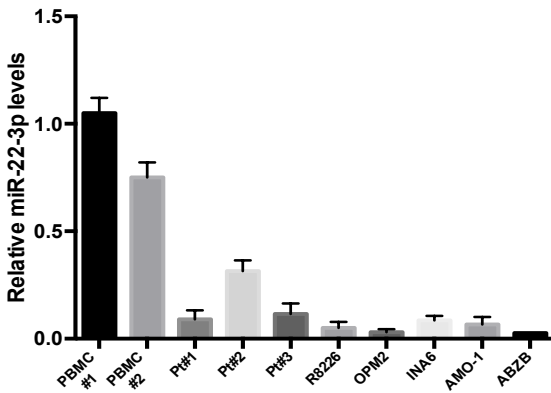

d

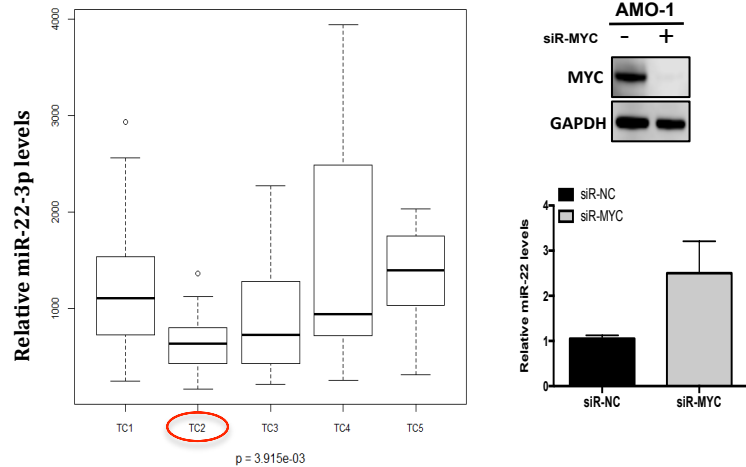

e

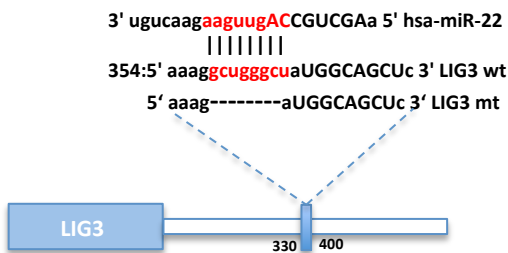

f

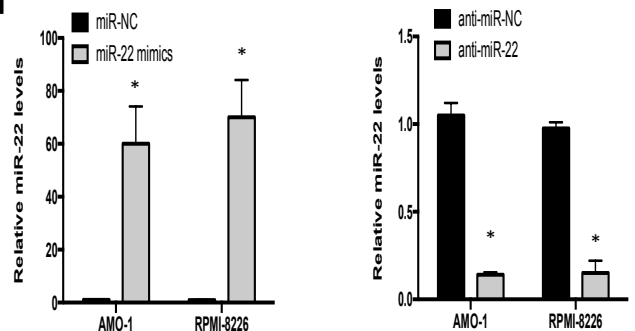

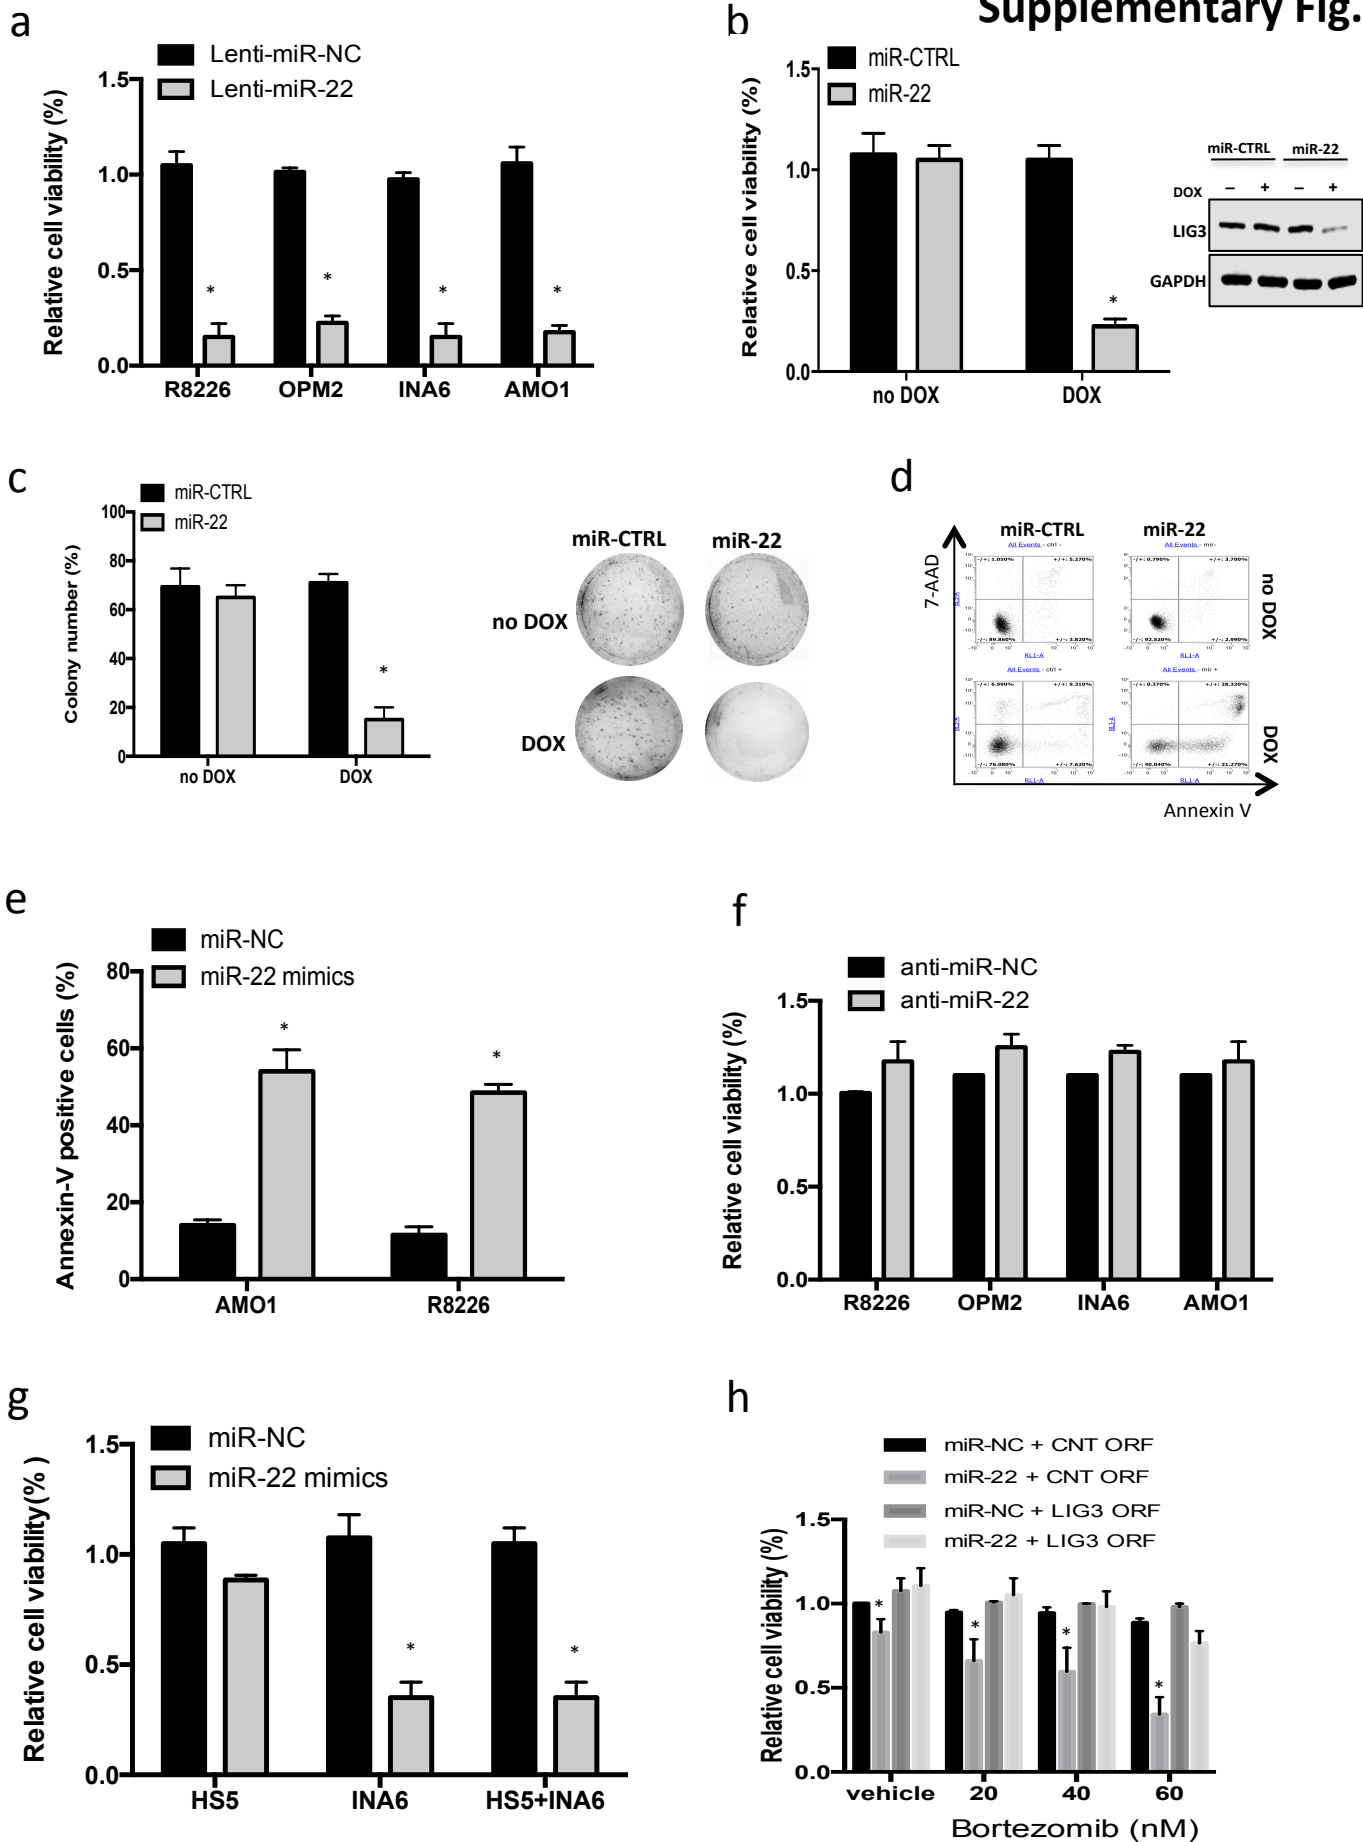

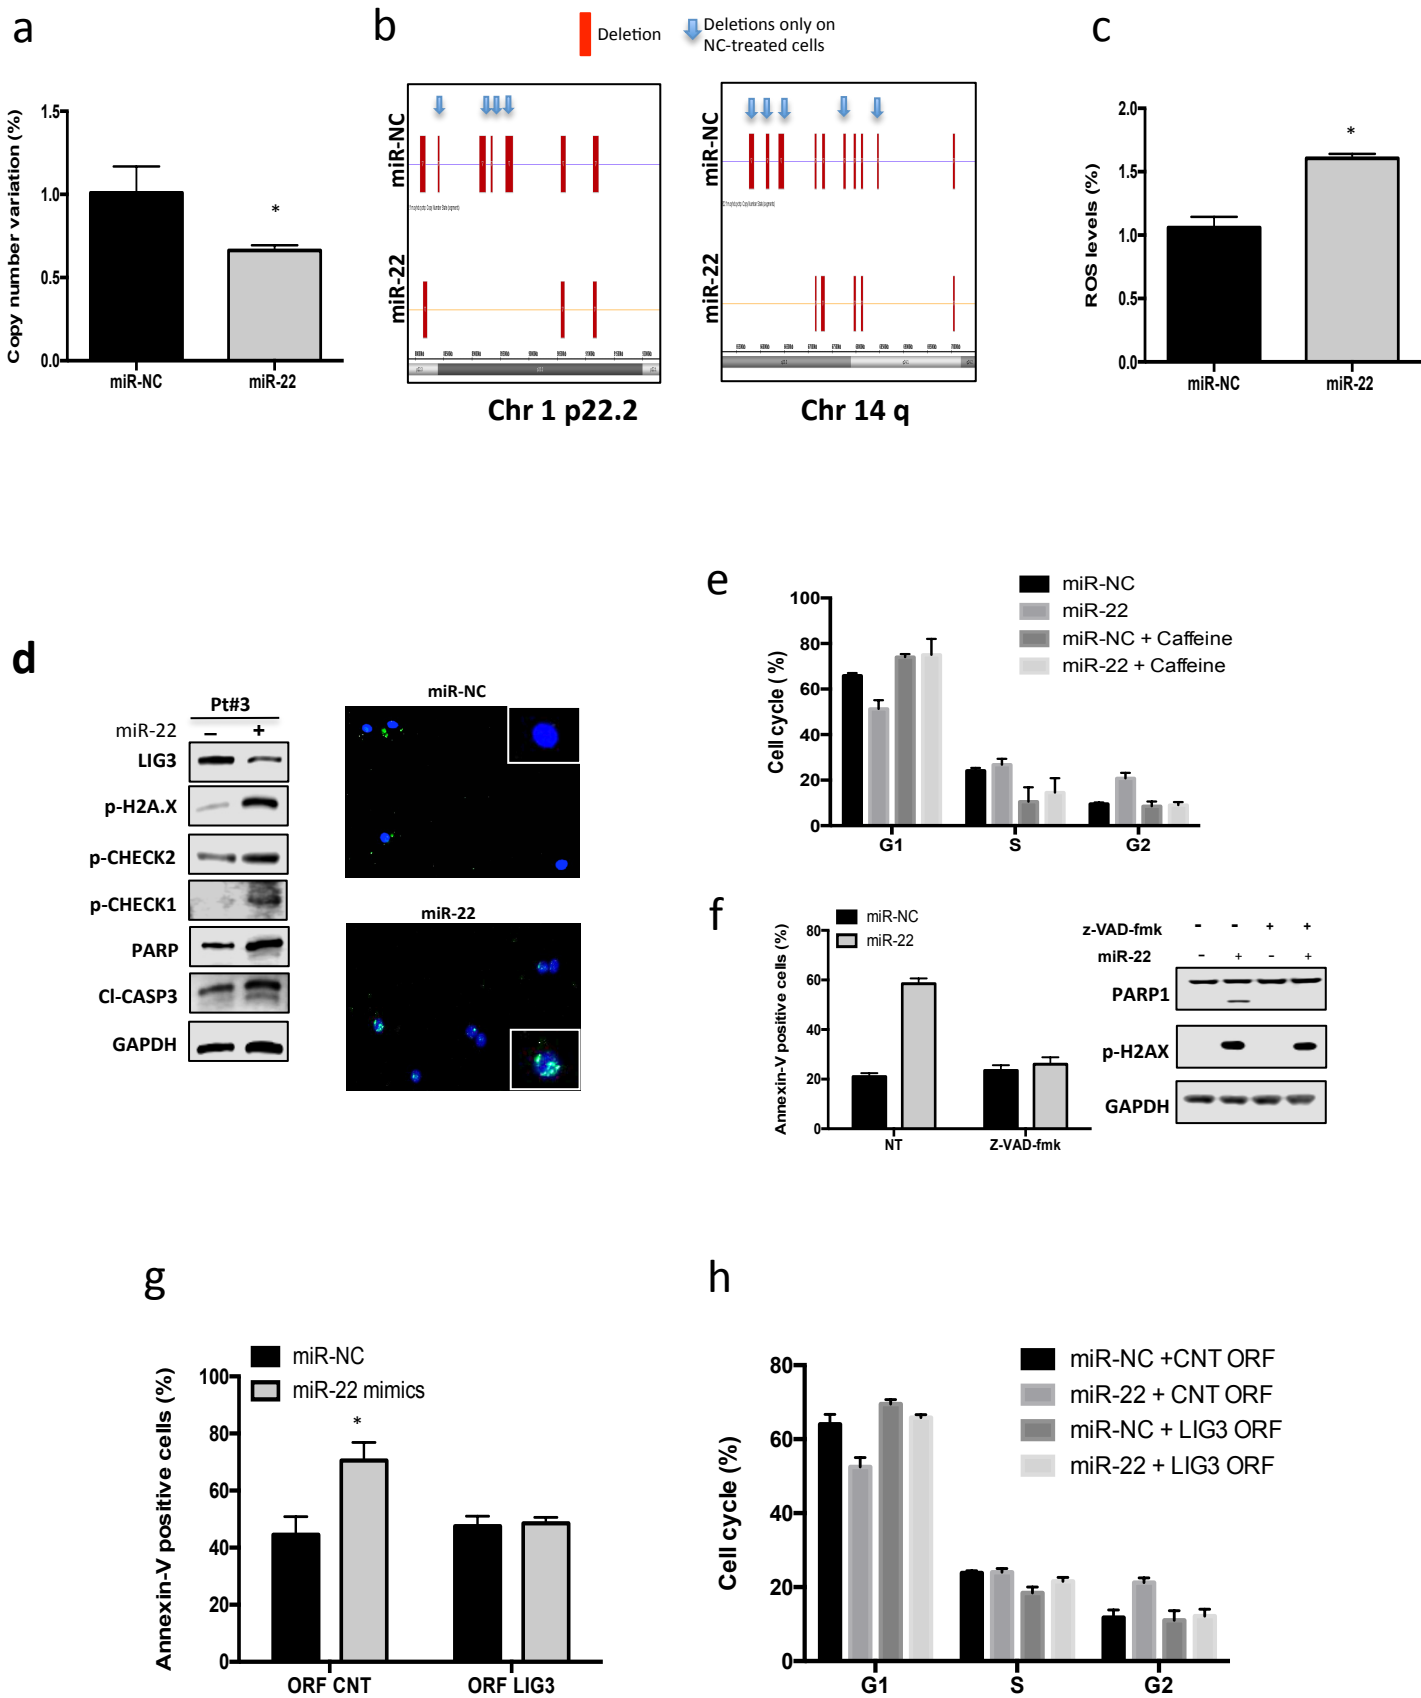

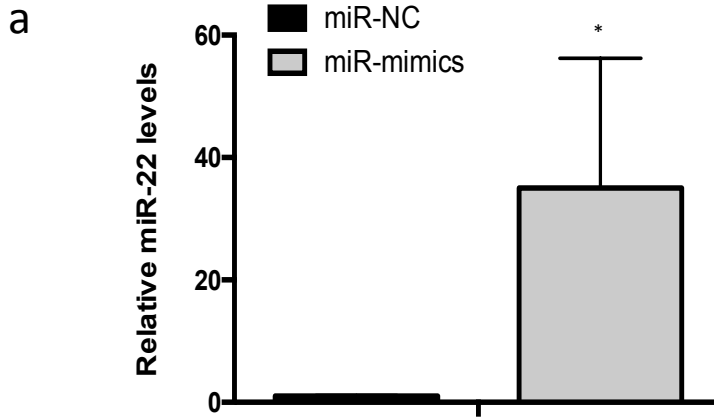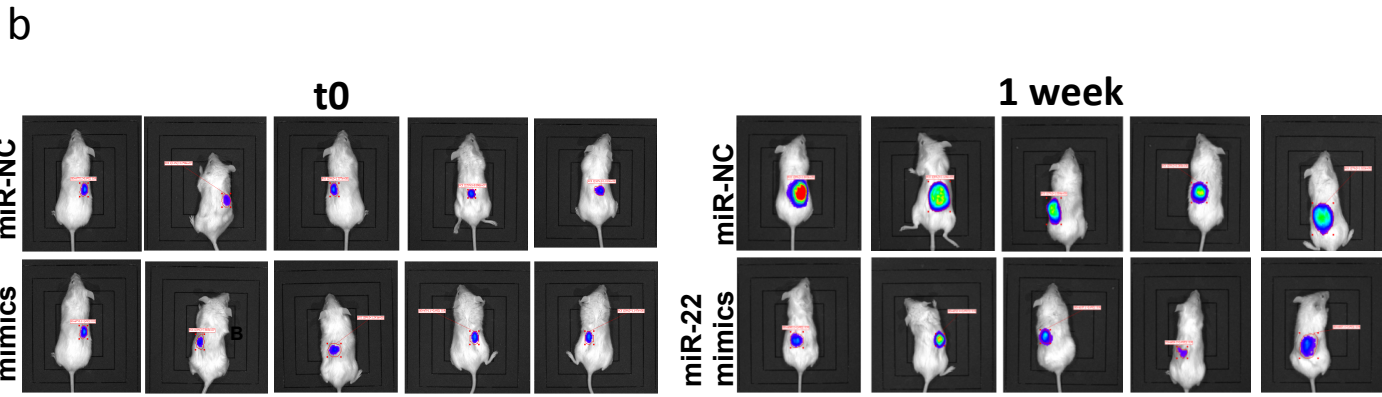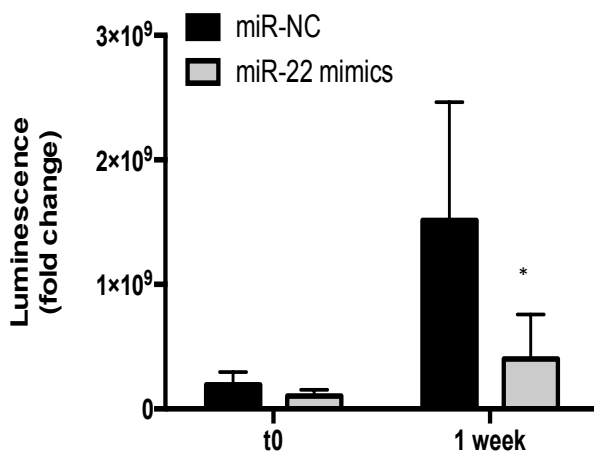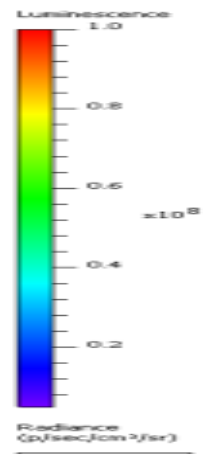

Supplement: 41375_2018_238_MOESM2_ESM.pdf [file 41375_2018_238_MOESM2_ESM.pdf]
